# Supplementary material for: Genome-Wide Uncovering of STAT3-Mediated miRNA Expression Profiles in Colorectal Cancer Cell Lines
Source: Hindawi journal article supplement (doi:10.1155/2014/187105), 2014-01-01

Table S1. Sequencing data of SW480/STAT3-siRNA and SW480/siRNA-control.

|  | **SW480/STAT3-siRNA** | | **SW480/siRNA-control** | |
| --- | --- | --- | --- | --- |
| **Type** | Counts | Percentage (%) | Counts | Percentage (%) |
| **high quality reads** | 14,462,458 | 100% | 10,938,240 | 100% |
| **3'adaptor-null** | 10,019 | 0.07% | 7,666 | 0.07% |
| **insert-null** | 7,589 | 0.05% | 8,732 | 0.08% |
| **5'adaptor-contaminants adaptor-contaminants** | 92,858 | 0.64% | 113,141 | 1.03% |
| **smaller than 18nt** | 269,571 | 1.86% | 219,626 | 2.01% |
| **polyA** | 1,018 | 0.01% | 835 | 0.01% |
| **clean reads** | 14,081,403 | 97.37% | 10,588,240 | 96.80% |

Meaning of rows with  in the above table: 3' adaptor-null: number of reads with no 3' adaptor; insert-null: number of reads with no insertion; 5' adaptor-contaminants: number of 5' contaminants; smaller than 18nt: number of reads smaller than 18 nt; polyA: number of reads with polyA; clean reads: number of clean reads after adaptors and contaminants are removed.

**Table S2. Gene Ontology enrichment analysis of predicted targets of differentially expressed novel miRNAs.**

| **GO ID** | **GO term** | **Bonferroni**  **Correction**  **CoCorrectioncorrection** |
| --- | --- | --- |
| GO:0022008 | neurogenesis | 8.92E-09 |
| GO:0048468 | cell development | 1.28E-08 |
| GO:0006366 | transcription from RNA polymerase II promoter | 1.80E-08 |
| GO:0006357 | regulation of transcription from RNA polymerase II promoter | 2.78E-08 |
| GO:0048699 | generation of neurons | 5.47E-08 |
| GO:0048856 | anatomical structure development | 7.96E-08 |
| GO:0048731 | system development | 1.13E-07 |
| GO:0007399 | nervous system development | 1.13E-07 |
| GO:0048869 | cellular developmental process | 4.83E-07 |
| GO:0007275 | multicellular organismal development | 4.98E-07 |
| GO:0032502 | developmental process | 1.28E-06 |
| GO:0019222 | regulation of metabolic process | 1.32E-06 |
| GO:0030030 | cell projection organization | 1.73E-06 |
| GO:0030182 | neuron differentiation | 3.84E-06 |
| GO:0019219 | regulation of nucleobase, nucleoside, nucleotide and nucleic acid metabolic process | 3.97E-06 |
| GO:0080090 | regulation of primary metabolic process | 4.63E-06 |
| GO:0080090 | regulation of primary metabolic process | 4.63E-06 |
| GO:0030154 | cell differentiation | 5.19E-06 |
| GO:0051171 | regulation of nitrogen compound metabolic process | 5.79E-06 |
| GO:0009889 | regulation of biosynthetic process | 7.11E-06 |
| GO:0031326 | regulation of cellular biosynthetic process | 9.59E-06 |
| GO:0031323 | regulation of cellular metabolic process | 1.18E-05 |
| GO:0048513 | organ development | 9.95E-05 |
| GO:0065007 | biological regulation | 1.00E-04 |
| GO:0048666 | neuron development | 1.20E-04 |
| GO:0009888 | tissue development | 1.70E-04 |
| GO:0016043 | cellular component organization | 2.60E-04 |
| GO:0051252 | regulation of RNA metabolic process | 3.20E-04 |
| GO:0060255 | ®ulation of macromolecule metabolic process | 3.30E-04 |
| GO:0009653 | anatomical structure morphogenesis | 5.20E-04 |
| GO:0031175 | neuron projection development | 5.50E-04 |
| GO:0006355 | regulation of transcription, DNA-dependent | 6.20E-04 |
| GO:0007417 | central nervous system development | 6.20E-04 |
| GO:0010556 | regulation of macromolecule biosynthetic process | 6.40E-04 |
| GO:0045449 | regulation of transcription | 7.40E-04 |
| GO:0010556 | regulation of macromolecule biosynthetic process | 9.20E-04 |
| GO:0050789 | regulation of biological process | 9.40E-04 |
| GO:0010468 | regulation of gene expression | 1.13E-03 |
| GO:0060255 | regulation of macromolecule metabolic process | 1.13E-03 |
| GO:0065008 | regulation of biological quality | 3.16E-03 |
| GO:0009987 | cellular process | 3.49E-03 |

**Table S3. The KEGG analysis of predicted targets mediated by novel miRNAs.**

| **Term** | **Pathway** | **Gene count** | **Percentage (%)** | **Bonferroni correction** |
| --- | --- | --- | --- | --- |
| hsa04012 | ErbB signaling pathway | 288 | 1.32 | 2.17E-02 |
| hsa04010 | MAPK signaling pathway | 736 | 3.36 | 2.17E-02 |
| hsa04330 | Notch signaling pathway | 120 | 0.55 | 2.63E-02 |
| hsa05212 | Pancreatic cancer | 179 | 0.82 | 2.88E-02 |
| hsa00514 | Other types of O-glycan biosynthesis | 109 | 0.50 | 3.83E-02 |

**Figure S1. Size distributions of small RNAs in SW480/siRNA-control and SW480/STAT3-siRNA cells.** 22-nucleotide small RNAs are enriched in both samples, which is in line with the typical size of miRNAs.


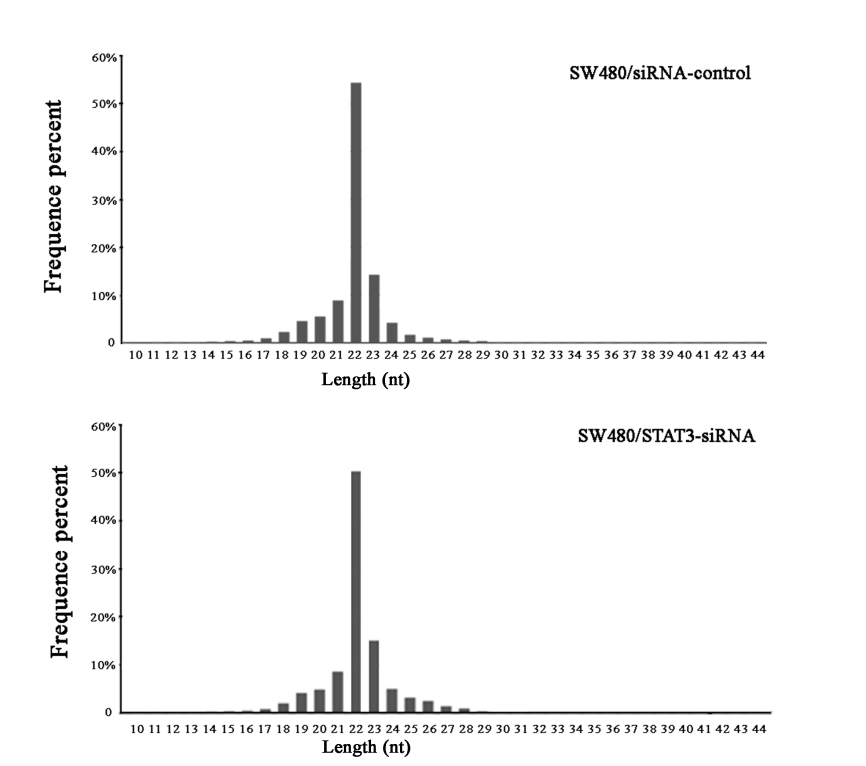


#### Figure S2. **Base compositions of small RNAs in** SW480/siRNA-control and SW480/STAT3-siRNA cells. Each color represents the small RNA tags whose first base is a certain base. Most 22-nt small RNAs begin with the base “U”. The 23-nt small RNAs display a bias to “A” and “U” at first base in SW480/STAT3-siRNA while only “U” in SW480/siRNA-control.


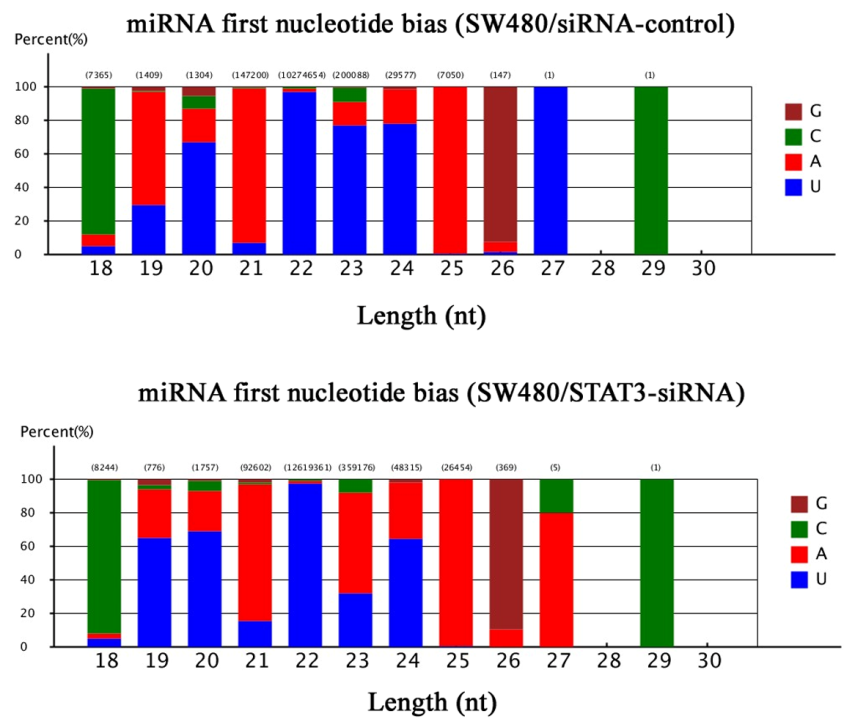


#### Figure S3. **The proportions of unique common tags and total common tags of small RNAs detected in** SW480/siRNA-control and SW480/STAT3-siRNA cells****.**** The very few unique common tags indicate that SW480/STAT3-siRNA presents a distinctive small RNA profile compared to SW480/siRNA-control.

####
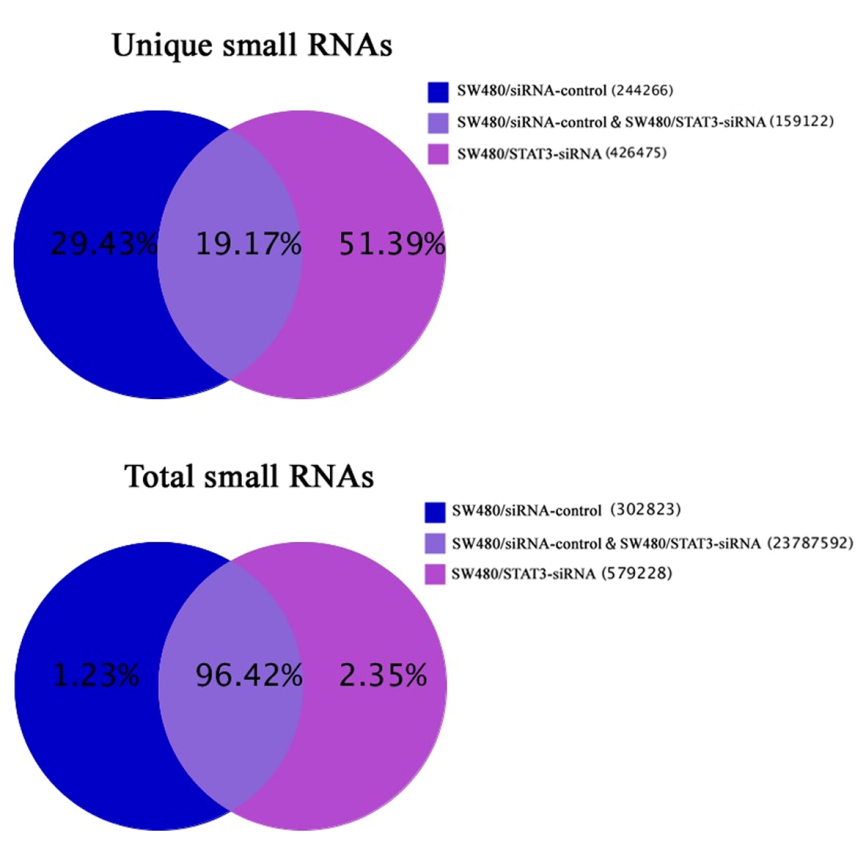


#### Figure S4. **Mapping of small RNAs from SW480/siRNA-control and SW480/STAT3-siRNA cells onto human chromosomes, respectively.** Red lines indicate miRNAs that are located on the antisense chains of genome while the blue ones are on the sense chains.

####
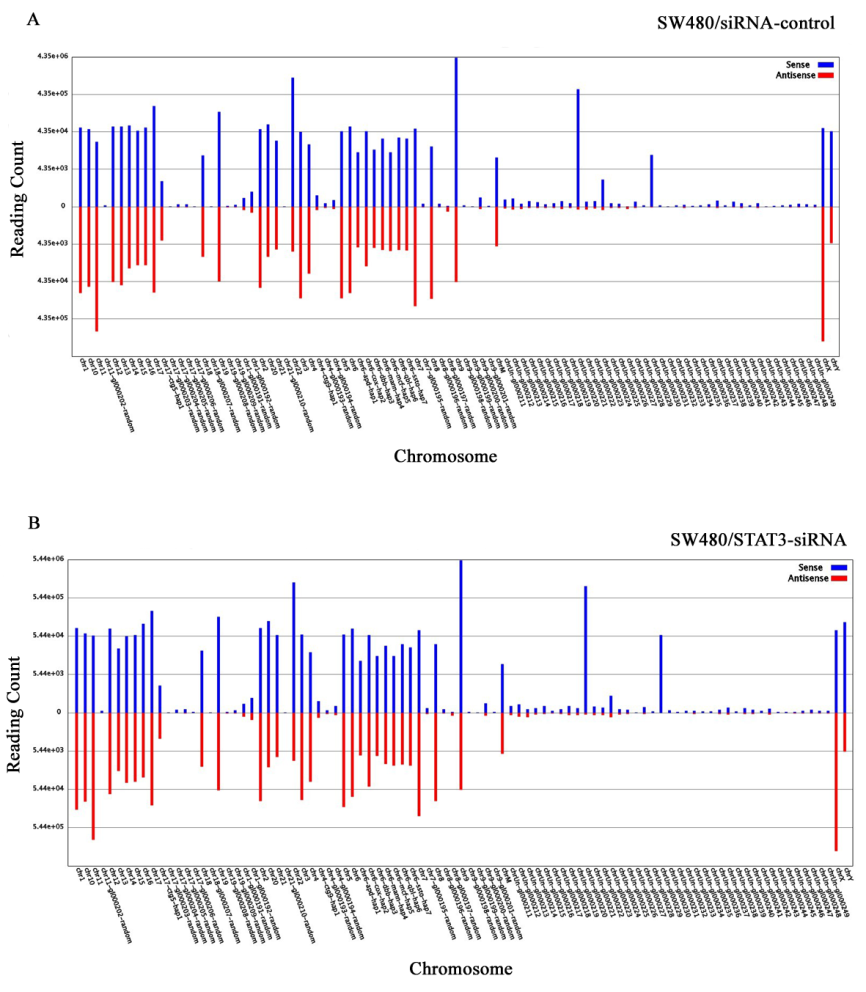

Supplement: f1 [file 187105.f1.doc]
